# Supplementary material
Source: HighWire-hosted journal article supplement (https://bibliotheek.ehb.be:2668/highwire/filestream/161067/field_highwire_adjunct_files/1/ip-2023-045177supp002_data_supplement.pdf)
Supplement: ip-2023-045177supp002_data_supplement.pdf [file ip-2023-045177supp002_data_supplement.pdf]

## Supplemental Tables

SUPPLEMENTAL TABLE A1

Original (French) and Translated (English) Keywords\* Used to Detect Cases for the BCQ Sport and Recreation Deaths Database and Subscription Service

| DB (original)              | DB (translation)             | SS                         | SS (translation)             |
|----------------------------|------------------------------|----------------------------|------------------------------|
| Chasse                     | Hunting                      | Chasse                     | Hunting                      |
| Pêche                      | Fishing                      | Pêche                      | Fishing                      |
| Plongée                    | Diving                       | Plongée                    | Diving                       |
| Danse                      | Dancing                      | Danse                      | Dancing                      |
| Ski                        | Skiing                       | Ski                        | Skiing                       |
| Quille                     | Bowling                      | Quille                     | Bowling                      |
| Aquaforme                  | Aquafitness                  | Aquaforme                  | Aquafitness                  |
| Bicyclette                 | Bicycle                      | Bicyclette                 | Bicycle                      |
| Vélo                       | Cycling                      | Vélo                       | Cycling                      |
| Basketball                 | Basketball                   | Basketball                 | Basketball                   |
| Crosse                     | Lacrosse                     | Crosse                     | Lacrosse                     |
| Karaté                     | Karate                       | Karaté                     | Karate                       |
| Volleyball                 | Volleyball                   | Volleyball                 | Volleyball                   |
| Golf                       | Golf                         | Golf                       | Golf                         |
| Physique                   | Physical                     | Physique                   | Physical                     |
| Jogging                    | Jogging                      | Jogging                    | Jogging                      |
| Baignade                   | Swimming                     | Baignade                   | Swimming                     |
| Hockey                     | Hockey                       | Hockey                     | Hockey                       |
| Marathon                   | Marathon                     | Marathon                   | Marathon                     |
| Judo                       | Judo                         | Judo                       | Judo                         |
| Soccer                     | Soccer                       | Soccer                     | Soccer                       |
| Football                   | Football                     | Football                   | Football                     |
| Roulette (planche/patin à) | Skateboarding/Roller skating | Roulette (planche/patin à) | Skateboarding/Roller skating |
| Planche                    | Board                        | Planche                    | Board                        |
| Motoneige                  | Snowmobile                   |                            |                              |
| Bateau                     | Boat                         |                            |                              |
| Noyade                     | Drowning                     |                            |                              |
| Monture                    | Mount                        | Équitation                 | Horse riding                 |
| Avalanche                  | Avalanche                    |                            |                              |
| Sport(if/ive)              | Sport(sportsman/sportswoman) |                            |                              |
| Boxe                       | Boxing                       |                            |                              |

DB: Sport and recreation deaths database

SS: Subscription service

\* While some cases may have been undetected, all keywords listed, whether partial or complete, were automatically captured. To address potential typos or inconsistencies, data integration into the BCQ database incorporates a revalidation process overseen by medical archivists. Additionally, to minimize undetected errors, the first condition of the BCQ algorithm (Methods section), acts as an added safety measure, complementing the keyword-based detection system (high redundancy).

SUPPLEMENTAL TABLE A2

Codes Extracted From the International Classification of Diseases and Related Health Problems 10th Revision (ICD-10)\* for the BCQ Sport and Recreation Deaths Database and Subscription Service and Occurrences of Each Code in the Final 06-19 Sport and Recreation Deaths-Analysed Database

| Code Categorie                              | Code    | DB | SS | DB <sub>f</sub> | Description                                                                                                         |
|---------------------------------------------|---------|----|----|-----------------|---------------------------------------------------------------------------------------------------------------------|
| V10-V19                                     | V10     | x  | x  | x               | Pedal cyclist injured in collision with pedestrian or animal                                                        |
| Pedal cyclist injured in transport accident | V11     | x  | x  | x               | Pedal cyclist injured in collision with other pedal cycle                                                           |
|                                             | V12     | x  | x  | x               | Pedal cyclist injured in collision with two- or three-wheeled motor vehicle                                         |
|                                             | V13     | x  | x  | x               | Pedal cyclist injured in collision with car, pick-up truck or van                                                   |
|                                             | V14     | x  | x  | x               | Pedal cyclist injured in collision with heavy transport vehicle or bus                                              |
|                                             | V15     | x  | x  | x               | Pedal cyclist injured in collision with railway train or railway vehicle                                            |
|                                             | V16     | x  | x  |                 | Pedal cyclist injured in collision with other nonmotor vehicle                                                      |
|                                             | V17     | x  | x  | x               | Pedal cyclist injured in collision with fixed or stationary object                                                  |
|                                             | V18     | x  | x  | x               | Pedal cyclist injured in noncollision transport accident                                                            |
|                                             | V10-V18 |    |    |                 |                                                                                                                     |
|                                             | .0      | x  | x  | x               | Driver injured in nontraffic accident                                                                               |
|                                             | .1      | x  | x  |                 | Passenger injured in nontraffic accident                                                                            |
|                                             | .2      | x  | x  |                 | Unspecified pedal cyclist injured in nontraffic accident                                                            |
|                                             | .3      | x  | x  |                 | Person injured while boarding or alighting                                                                          |
|                                             | .4      | x  | x  | x               | Driver injured in traffic accident                                                                                  |
|                                             | .5      | x  | x  |                 | Passenger injured in traffic accident                                                                               |
|                                             | .9      | x  | x  | x               | Unspecified pedal cyclist injured in traffic accident                                                               |
|                                             | V19     |    |    |                 | Pedal cyclist injured in other and unspecified transport accidents                                                  |
|                                             | V19.0   | x  | x  |                 | Driver injured in collision with other and unspecified motor vehicles in nontraffic accident                        |
|                                             | V19.1   | x  | x  |                 | Passenger injured in collision with other and unspecified motor vehicles in nontraffic accident                     |
|                                             | V19.2   | x  | x  |                 | Unspecified pedal cyclist injured in collision with other and unspecified motor vehicles in nontraffic accident     |
|                                             | V19.3   | x  | x  |                 | Pedal cyclist [any] injured in unspecified nontraffic accident                                                      |
|                                             | V19.4   | x  | x  |                 | Driver injured in collision with other and unspecified motor vehicles in traffic accident                           |
|                                             | V19.5   | x  | x  |                 | Passenger injured in collision with other and unspecified motor vehicles in traffic accident                        |
|                                             | V19.6   | x  | x  |                 | Unspecified pedal cyclist injured in collision with other and unspecified motor vehicles in traffic accident        |
|                                             | V19.8   | x  | x  |                 | Pedal cyclist [any] injured in other specified transport accidents                                                  |
|                                             | V19.9   | x  | x  | x               | Pedal cyclist [any] injured in unspecified traffic accident                                                         |
| V80, V86 and V89                            | V80     |    |    |                 | Animal-rider or occupant of animal-drawn vehicle injured in transport accident                                      |
| Other land transport accidents              | V80.0   | x  | x  | x               | Rider or occupant injured by fall from or being thrown from animal or animal-drawn vehicle in noncollision accident |
|                                             | V80.1   | x  | x  |                 | Rider or occupant injured in collision with pedestrian or animal                                                    |
|                                             | V80.2   | x  | x  |                 | Rider or occupant injured in collision with pedal cycle                                                             |
|                                             | V80.3   | x  | x  |                 | Rider or occupant injured in collision with two- or three-wheeled motor vehicle                                     |

|                                   |         |   |   |   |                                                                                                                           |
|-----------------------------------|---------|---|---|---|---------------------------------------------------------------------------------------------------------------------------|
|                                   | V80.4   | x | x |   | Rider or occupant injured in collision with car, pick-up truck, van, heavy transport vehicle or bus                       |
|                                   | V80.5   | x | x |   | Rider or occupant injured in collision with other specified motor vehicle                                                 |
|                                   | V80.6   | x | x |   | Rider or occupant injured in collision with railway train or railway vehicle                                              |
|                                   | V80.7   | x | x |   | Rider or occupant injured in collision with other nonmotor vehicle                                                        |
|                                   | V80.8   | x | x |   | Rider or occupant injured in collision with fixed or stationary object                                                    |
|                                   | V80.9   | x | x | x | Rider or occupant injured in other and unspecified transport accidents                                                    |
|                                   | V86     |   |   |   | Occupant of special all-terrain or other motor vehicle designed primarily for off-road use, injured in transport accident |
|                                   | V86.0   | x | x | x | Driver of all-terrain or other off-road motor vehicle injured in traffic accident                                         |
|                                   | V86.1   | x | x | x | Passenger of all-terrain or other off-road motor vehicle injured in traffic accident                                      |
|                                   | V86.2   | x | x | x | Person on outside of all-terrain or other off-road motor vehicle injured in traffic accident                              |
|                                   | V86.3   | x | x |   | Unspecified occupant of all-terrain or other off-road motor vehicle injured in traffic accident                           |
|                                   | V86.4   | x | x |   | Person injured while boarding or alighting from all-terrain or other off-road motor vehicle                               |
|                                   | V86.5   | x | x | x | Driver of all-terrain or other off-road motor vehicle injured in nontraffic accident                                      |
|                                   | V86.6   | x | x | x | Passenger of all-terrain or other off-road motor vehicle injured in nontraffic accident                                   |
|                                   | V86.7   | x | x | x | Person on outside of all-terrain or other off-road motor vehicle injured in nontraffic accident                           |
|                                   | V86.9   | x | x | x | Unspecified occupant of all-terrain or other off-road motor vehicle injured in nontraffic accident                        |
|                                   | V89     |   |   |   | Motor- or nonmotor-vehicle accident, type of vehicle unspecified                                                          |
|                                   | V89.0   | x |   |   | Person injured in unspecified motor-vehicle accident, nontraffic                                                          |
|                                   | V89.1   | x |   |   | Person injured in unspecified nonmotor-vehicle accident, nontraffic                                                       |
|                                   | V89.2   | x |   |   | Person injured in unspecified motor-vehicle accident, traffic                                                             |
|                                   | V89.3   | x |   |   | Person injured in unspecified nonmotor-vehicle accident, traffic                                                          |
|                                   | V89.9   | x |   |   | Person injured in unspecified vehicle accident                                                                            |
| V90-V94                           | V90     | x | x | x | Accident to watercraft causing drowning and submersion                                                                    |
| Water transport accidents         | V91     | x | x | x | Accident to watercraft causing other injury                                                                               |
|                                   | V92     | x | x | x | Water-transport-related drowning and submersion without accident to watercraft                                            |
|                                   | V93     | x | x |   | Accident on board watercraft without accident to watercraft, not causing drowning and submersion                          |
|                                   | V94     | x | x | x | Other and unspecified water transport accidents                                                                           |
|                                   | V90-V94 |   |   |   |                                                                                                                           |
|                                   | .0      | x | x | x | Merchant ship                                                                                                             |
|                                   | .1      | x | x |   | Passenger ship (Ferry, Liner)                                                                                             |
|                                   | .2      | x | x | x | Fishing boat                                                                                                              |
|                                   | .3      | x | x | x | Other powered watercraft                                                                                                  |
|                                   | .4      | x | x | x | Sailboat                                                                                                                  |
|                                   | .5      | x | x | x | Canoe or kayak                                                                                                            |
|                                   | .6      | x | x | x | Inflatable craft (nonpowered)                                                                                             |
|                                   | .7      | x | x | x | Water-skis                                                                                                                |
|                                   | .8      | x | x | x | Other unpowered watercraft                                                                                                |
|                                   | .9      | x | x | x | Unspecified watercraft                                                                                                    |
| V96 and V97.2                     | V96     |   |   |   | Accident to nonpowered aircraft causing injury to occupant                                                                |
| Air and space transport accidents | V96.0   | x | x |   | Balloon accident injuring occupant                                                                                        |
|                                   | V96.1   | x | x | x | Hang-glider accident injuring occupant                                                                                    |

|                                                |       |   |   |   |                                                                               |
|------------------------------------------------|-------|---|---|---|-------------------------------------------------------------------------------|
|                                                | V96.2 | x | x | x | Glider (nonpowered) accident injuring occupant                                |
|                                                | V96.8 | x | x | x | Other nonpowered-aircraft accidents injuring occupant                         |
|                                                | V96.9 | x | x | x | Unspecified nonpowered-aircraft accident injuring occupant                    |
|                                                | V97   |   |   |   | Other specified air transport accidents                                       |
|                                                | V97.2 | x | x | x | Parachutist injured in air transport accident                                 |
| V98 Other and unspecified transport accidents  | V98   |   | x | x | Other specified transport accidents                                           |
| W02, W21, W67, W68, W69, W70, W73, W74 and X36 | W02   | x | x | x | Fall involving ice-skates, skis, roller-skates or skateboards                 |
|                                                | W09   |   | x |   | Fall involving playground equipment                                           |
| Other external causes of accidental injury     | W16   |   | x | x | Diving or jumping into water causing injury other than drowning or submersion |
|                                                | W21   | x | x | x | Striking against or struck by sports equipment                                |
|                                                | W67   | x | x | x | Drowning and submersion while in swimming-pool                                |
|                                                | W68   | x | x | x | Drowning and submersion following fall into swimming-pool                     |
|                                                | W69   | x | x | x | Drowning and submersion while in natural water                                |
|                                                | W70   | x | x | x | Drowning and submersion following fall into natural water                     |
|                                                | W73   | x |   | x | Other specified drowning and submersion                                       |
|                                                | W74   | x |   | x | Unspecified drowning and submersion                                           |
|                                                | W94   |   | x | x | Exposure to high and low air pressure and changes in air pressure             |
|                                                | X36   | x |   | x | Victim of avalanche, landslide and other earth movements                      |

DB: BCQ sport and recreation deaths database

SS: subscription service

DB: final 2006-2019 sport and recreation deaths analysed database

[\\*https://icd.who.int/browse10/2010/en](https://icd.who.int/browse10/2010/en)
